# Supplementary material for: Improvement of Lipoprotein Profile and Metabolic Endotoxemia by a Lifestyle Intervention That Modifies the Gut Microbiota in Subjects With Metabolic Syndrome
Source: PubMed Central journal article supplement — J Am Heart Assoc. 2019 Aug 27;8(17):e012401. doi: 10.1161/JAHA.119.012401 (PMC6755842; doi:10.1161/jaha.119.012401), 2019-08-27

# **SUPPLEMENTAL MATERIAL**

**Table S1. Anthropometric and biochemical parameters in 1065 subjects according obesity class and sex.**

|             | Normal<br>BMI $\leq$ 25<br>kg/m <sup>2</sup><br>n= 35 | Overweight<br>subjects<br>BMI >25-29.9<br>kg/m <sup>2</sup><br>n=312 | Obesity Class I<br>subjects<br>BMI 30-34.9<br>kg/m <sup>2</sup><br>n=412 | Obesity<br>Class II<br>subjects<br>BMI 35-39.9<br>kg/m <sup>2</sup><br>n= 210 | Obesity<br>Class III<br>subjects<br>BMI $\geq$ 40<br>kg/m <sup>2</sup><br>n= 92 | <i>P</i><br>BMI | <i>P</i><br>sex | <i>P</i><br>BMI x<br>sex |
|-------------|-------------------------------------------------------|----------------------------------------------------------------------|--------------------------------------------------------------------------|-------------------------------------------------------------------------------|---------------------------------------------------------------------------------|-----------------|-----------------|--------------------------|
| Sex         |                                                       |                                                                      |                                                                          |                                                                               |                                                                                 |                 |                 |                          |
| M/W         |                                                       |                                                                      |                                                                          |                                                                               |                                                                                 |                 |                 |                          |
| Men         | 9                                                     | 51                                                                   | 96                                                                       | 35                                                                            | 14                                                                              |                 |                 |                          |
| Women       | 26                                                    | 261                                                                  | 316                                                                      | 175                                                                           | 78                                                                              |                 |                 |                          |
| Age (years) |                                                       |                                                                      |                                                                          |                                                                               |                                                                                 |                 |                 |                          |
| Men         | 33.1 $\pm$ 3.25                                       | 39.9 $\pm$ 1.50                                                      | 40.7 $\pm$ 1.12                                                          | 36.8 $\pm$ 1.65                                                               | 32.7 $\pm$ 2.53                                                                 | 0.026           | 0.006           | 0.021                    |
| Women       | 38.5 $\pm$ 2.58                                       | 40.6 $\pm$ 0.61                                                      | 39.3 $\pm$ 0.57                                                          | 40.6 $\pm$ 0.71                                                               | 39.7 $\pm$ 1.11                                                                 |                 |                 |                          |
| Weight (Kg) |                                                       |                                                                      |                                                                          |                                                                               |                                                                                 |                 |                 |                          |
| Men         | 67.2 $\pm$ 1.28                                       | 80.2 $\pm$ 0.86                                                      | 92.3 $\pm$ 0.80                                                          | 108 $\pm$ 1.97                                                                | 135 $\pm$ 4.50                                                                  | 0.0001          | 0.0001          | 0.0001                   |

|                             |             |             |             |             |             |        |        |        |
|-----------------------------|-------------|-------------|-------------|-------------|-------------|--------|--------|--------|
| Women                       | 60.7 ± 0.64 | 69.0 ± 0.40 | 80.2 ± 0.42 | 90.5 ± 0.68 | 109 ± 1.95  |        |        |        |
| BMI (Kg/ m <sup>2</sup> )   |             |             |             |             |             |        |        |        |
| Men                         | 22.8 ± 0.63 | 27.9 ± 0.19 | 32.6 ± 0.14 | 37.0 ± 0.28 | 43.7 ± 0.92 | 0.0001 | 0.192  | 0.559  |
| Women                       | 23.5 ± 0.24 | 27.9 ± 0.08 | 32.4 ± 0.07 | 37.0 ± 0.10 | 44.3 ± 0.45 |        |        |        |
| Waist circumference<br>(cm) |             |             |             |             |             |        |        |        |
| Men                         | 81.8 ± 2.87 | 96.0 ± 0.93 | 107 ± 0.62  | 116 ± 1.38  | 133 ± 3.45  | 0.0001 | 0.0001 | 0.0001 |
| Women                       | 80.4 ± 1.55 | 89.5 ± 0.40 | 97.7 ± 0.40 | 104 ± 0.73  | 116 ± 1.21  |        |        |        |
| Body fat (%)                |             |             |             |             |             |        |        |        |
| Men                         | 39.5 ± 0.00 | 39.0 ± 0.18 | 38.1 ± 0.20 | 38.0 ± 0.40 | 39.0 ± 0.31 | 0.009  | 0.387  | 0.0001 |
| Women                       | 38.2 ± 0.36 | 37.8 ± 0.11 | 39.4 ± 0.08 | 39.5 ± 0.08 | 39.5 ± 0.06 |        |        |        |
| Lean mass (%)               |             |             |             |             |             |        |        |        |
| Men                         | 56.1 ± 0.00 | 55.7 ± 0.29 | 55.8 ± 0.32 | 55.9 ± 0.32 | 50.4 ± 3.34 | 0.0001 | 0.0001 | 0.0001 |
| Women                       | 56.2 ± 0.10 | 56.4 ± 0.08 | 54.0 ± 0.19 | 51.1 ± 0.27 | 48.0 ± 0.68 |        |        |        |





|                                 |              |             |             |             |             |        |        |       |
|---------------------------------|--------------|-------------|-------------|-------------|-------------|--------|--------|-------|
| (mmol/L)                        |              |             |             |             |             |        |        |       |
| Men                             | 3.40 ± 0.19  | 3.30 ± 0.13 | 3.45 ± 0.11 | 3.25 ± 0.17 | 3.05 ± 0.20 | 0.106  | 0.899  | 0.984 |
| Women                           | 3.37 ± 0.11  | 3.30 ± 0.05 | 3.40 ± 0.05 | 3.22 ± 0.06 | 3.12 ± 0.09 |        |        |       |
| C - reactive protein<br>(mg/dL) |              |             |             |             |             |        |        |       |
| Men                             | 0.54 ± 0.16  | 2.48 ± 0.75 | 2.91 ± 0.27 | 5.04 ± 0.75 | 5.55 ± 0.86 | 0.0001 | 0.058  | 0.720 |
| Women                           | 1.54 ± 0.41  | 3.15 ± 0.30 | 3.65 ± 0.20 | 5.03 ± 0.35 | 8.14 ± 1.00 |        |        |       |
| Adiponectin (mg/L)              |              |             |             |             |             |        |        |       |
| Men                             |              | 3.86 ± 0.65 | 3.85 ± 0.27 | 4.52 ± 0.50 | 3.26        | 0.930  | 0.112  | 0.931 |
| Women                           | 4.62 ± 0.76  | 5.34 ± 0.37 | 5.38 ± 0.25 | 5.35 ± 0.35 | 4.66 ± 0.82 |        |        |       |
| Leptin (µg/L)                   |              |             |             |             |             |        |        |       |
| Men                             |              | 12.6 ± 1.72 | 20.7 ± 1.56 | 31.4 ± 3.22 | 62.6 ± 8.37 | 0.0001 | 0.0001 | 0.207 |
| Women                           | 37.24 ± 7.71 | 40.7 ± 1.70 | 58.2 ± 2.03 | 69.5 ± 3.16 | 82.6 ± 4.15 |        |        |       |

**Table S2. Anthropometric and biochemical parameters in subjects with overweight and obesity with and without metabolic syndrome (MetS).**

| Variable                           | w/o MetS<br>n=501    | MetS<br>n=564          | P Value |
|------------------------------------|----------------------|------------------------|---------|
| Men/Women No (%)                   | 84 (16.8)/417 (83.2) | 121(21.5) / 443 (78.5) | 0.001   |
| Age (years)                        | 38.7 ± 0.45          | 40.8 ± 0.42            | 0.001   |
| Weight (Kg)                        | 80.1 ± 0.71          | 86.4 ± 0.68            | 0.0001  |
| BMI (Kg/ m <sup>2</sup> )          | 31.5 ± 0.23          | 33.8 ± 0.21            | 0.0001  |
| Waist circumference (cm)           | 95.6 ± 0.55          | 102 ± 0.48             | 0.0001  |
| Body fat (%)                       | 38.8 ± 0.07          | 38.8 ± 0.07            | 0.83    |
| Lean mass (%)                      | 54.4 ± 0.18          | 53.7 ± 0.18            | 0.04    |
| Systolic blood Pressure<br>(mmHg)  | 108 ± 0.40           | 113 ± 0.42             | 0.0001  |
| Diastolic blood pressure<br>(mmHg) | 74.7 ± 0.29          | 79.5 ± 0.35            | 0.0001  |
| Glucose (mmol/L)                   | 4.79 ± 0.02          | 5.46 ± 0.06            | 0.0001  |
| Insulin (pmol/L)                   | 62.0 ± 1.86          | 83.9 ± 1.93            | 0.0001  |
| HOMA index                         | 1.88 ± 0.05          | 2.94 ± 0.08            | 0.0001  |
| Total cholesterol (mmol/L)         | 4.97 ± 0.04          | 5.35 ± 0.04            | 0.0001  |
| Triglycerides (mmol/L)             | 1.43 ± 0.02          | 2.60 ± 0.05            | 0.0001  |
| HDL- cholesterol (mmol/L)          | 1.29 ± 0.01          | 0.94 ± 0.01            | 0.0001  |
| LDL- cholesterol (mmol/L)          | 3.22 ± 0.03          | 3.40 ± 0.04            | 0.006   |
| C-reactive protein (mg/L)          | 3.21 ± 0.21          | 4.21 ± 0.18            | 0.0001  |
| Adiponectin (mg/L)                 | 5.61 ± 0.27          | 4.81 ± 0.17            | 0.012   |

|                            |                 |                 |       |
|----------------------------|-----------------|-----------------|-------|
| Leptin ( $\mu\text{g/L}$ ) | $49.7 \pm 1.90$ | $50.8 \pm 1.65$ | 0.649 |
|----------------------------|-----------------|-----------------|-------|

The values are means  $\pm$  SD; \* Data were analyzed using Independent Student's t test (w/o MetS and MetS group). MetS, metabolic syndrome; BMI, Body mass index.



**Table S3. Clinical and biochemical characteristics of normal weight group before and after the lifestyle intervention.**

| Variable                     | DI+P (n=10)  |                 | P value | DI+FF (n=11) |                 | P value |
|------------------------------|--------------|-----------------|---------|--------------|-----------------|---------|
|                              | Baseline     | After treatment |         | Baseline     | After treatment |         |
| <b>Weight, kg</b>            | 59.4 ± 2.15  | 59 ± 2.07       | 0.35    | 62.4 ± 2.49  | 62.5 ± 2.74     | 0.67    |
| <b>BMI, kg/m<sup>2</sup></b> | 22.4 ± 0.28  | 22.3 ± 0.31     | 0.32    | 23.3 ± 0.57  | 23.3 ± 0.62     | 0.95    |
| <b>Waist, cm</b>             | 76.0 ± 1.49  | 74.7 ± 1.36     | 0.16    | 78.8 ± 1.89  | 77.3 ± 1.73     | 0.24    |
| <b>SBP, mmHg</b>             | 101 ± 4.00   | 99.6 ± 2.85     | 0.60    | 99.5 ± 2.68  | 100 ± 2.91      | 0.78    |
| <b>DBP, mmHg</b>             | 68.4 ± 2.49  | 68.9 ± 2.37     | 0.77    | 64.3 ± 1.83  | 64.3 ± 2.36     | 0.79    |
| <b>Glucose, mmol/L</b>       | 4.59 ± 0.16  | 4.67 ± 0.13     | 0.38    | 4.83 ± 0.10  | 4.52 ± 0.09     | 0.03    |
| <b>Cholesterol, mmol/L</b>   | 4.53 ± 0.31  | 4.25 ± 0.32     | 0.13    | 4.15 ± 0.25  | 3.89 ± 0.22     | 0.18    |
| <b>HDL-C, mmol/L</b>         | 1.62 ± 0.16  | 1.50 ± 0.12     | 0.50    | 1.39 ± 0.10  | 1.43 ± 0.12     | 0.85    |
| <b>LDL-C, mmol/L</b>         | 2.51 ± 0.21  | 2.37 ± 0.20     | 0.13    | 2.30 ± 0.22  | 2.07 ± 0.169    | 0.15    |
| <b>Triglycerides, mmol/L</b> | 0.97 ± 0.14  | 0.88 ± 0.09     | 0.57    | 0.82 ± 0.05  | 0.90 ± 0.09     | 0.59    |
| <b>HOMA-IR</b>               | 0.74 ± 0.14  | 0.76 ± 0.11     | 0.95    | 1.15 ± 0.16  | 1.00 ± 0.14     | 0.85    |
| <b>AUC glucose, mmol/L</b>   | 673 ± 36.4   | 644 ± 29.2      | 0.79    | 707 ± 52.4   | 651 ± 59.7      | 0.07    |
| <b>AUC insulin pmol/L</b>    | 27632 ± 2977 | 22883 ± 3509    | 0.02    | 38801 ± 5279 | 35908 ± 4513    | 0.47    |

BMI indicates body mass index; SBP indicates systolic blood pressure; DBP indicates diastolic blood pressure; HDL-C indicates high density lipoprotein cholesterol; LDL-C indicates low density lipoprotein cholesterol; AUC indicates area under the curve; DI+P indicates dietary intervention plus placebo; DI+FF indicates dietary intervention plus functional foods. All values are presented as mean  $\pm$  SEM. Paired T-test was performed for all variables. Significant at  $p < 0.05$ .

**Table S4. Clinical and biochemical characteristics of metabolic syndrome group before and after the lifestyle intervention.**

| Variable                     | DI+P (n=17)  |                 | P value | DI+FF (n=18) |                 | P value |
|------------------------------|--------------|-----------------|---------|--------------|-----------------|---------|
|                              | Baseline     | After treatment |         | Baseline     | After treatment |         |
| <b>Weight, kg</b>            | 86.3 ± 3.08  | 84.4 ± 3.00     | 0.001   | 82.6 ± 2.5   | 79 ± 2.51       | 0.0001  |
| <b>BMI, kg/m<sup>2</sup></b> | 34.3 ± 0.89  | 33.6 ± 0.87     | 0.001   | 32.3 ± 0.76  | 30.8 ± 0.67     | 0.0001  |
| <b>Waist, cm</b>             | 102 ± 2.89   | 98.4 ± 2.58     | 0.02    | 102 ± 1.94   | 97.2 ± 1.85     | 0.001   |
| <b>SBP, mmHg</b>             | 108 ± 3.03   | 101 ± 6.03      | 0.55    | 115 ± 2.64   | 108 ± 2.69      | 0.01    |
| <b>DBP, mmHg</b>             | 76.3 ± 1.85  | 74.7 ± 2.1      | 0.18    | 80.0 ± 1.92  | 73 ± 2.09       | 0.002   |
| <b>Glucose, mmol/L</b>       | 5.51 ± 0.19  | 5.29 ± 0.23     | 0.03    | 5.43 ± 0.10  | 4.97 ± 0.168    | 0.04    |
| <b>Cholesterol, mmol/L</b>   | 4.94 ± 0.25  | 4.85 ± 0.27     | 0.52    | 5.27 ± 0.17  | 5.02 ± 0.28     | 0.08    |
| <b>HDL-C, mmol/L</b>         | 0.87 ± 0.05  | 0.91 ± 0.05     | 0.26    | 0.93 ± 0.06  | 0.84 ± 0.03     | 0.14    |
| <b>LDL-C, mmol/L</b>         | 2.91 ± 0.22  | 2.96 ± 0.24     | 0.72    | 3.11 ± 0.16  | 3.27 ± 0.26     | 0.74    |
| <b>Triglycerides, mmol/L</b> | 2.27 ± 0.21  | 2.26 ± 0.32     | 0.08    | 2.62 ± 0.38  | 2.16 ± 0.24     | 0.11    |
| <b>HOMA-IR</b>               | 4.75 ± 1.31  | 3.82 ± 0.91     | 0.43    | 3.60 ± 1.18  | 2.07 ± 0.29     | 0.09    |
| <b>AUC glucose mmol/L</b>    | 1089 ± 69.0  | 961 ± 40.7      | 0.04    | 988 ± 43.5   | 947 ± 34.1      | 0.10    |
| <b>AUC insulin pmol/L</b>    | 100447±12241 | 98159±12349     | 0.65    | 75627±7903   | 76952±12224     | 0.98    |

BMI indicates body mass index; SBP indicates systolic blood pressure; DBP indicates diastolic blood pressure; HDL-C indicates high density lipoprotein cholesterol; LDL-C indicates low density lipoprotein cholesterol; AUC indicates area under the curve; DI+P

indicates dietary intervention plus placebo; DI+FF indicates dietary intervention plus functional foods. All values are presented as mean $\pm$  SEM. Paired T-test was performed for all variables. Significant at  $p < 0.05$ .

**Table S5. Clinical and biochemical characteristics of metabolic syndrome + obesity class III group before and after the lifestyle intervention.**

| Variable                     | DI+P (n=9)  |                 | P value | DI+FF (n=11) |                 | P value |
|------------------------------|-------------|-----------------|---------|--------------|-----------------|---------|
|                              | Baseline    | After treatment |         | Baseline     | After treatment |         |
| <b>Weight, kg</b>            | 110.7±4.71  | 105.6±3.86      | 0.008   | 117.5±5.33   | 111.3±5.38      | 0.006   |
| <b>BMI, kg/m<sup>2</sup></b> | 43±0.928    | 41±0.703        | 0.008   | 44±1.08      | 41.8±1.3        | 0.006   |
| <b>Waist, cm</b>             | 122±2.88    | 119±3.28        | 0.05    | 123±3.99     | 116±3.88        | 0.009   |
| <b>SBP, mmHg</b>             | 109±3.4     | 113±3.28        | 0.26    | 112±3.27     | 107±2.93        | 0.44    |
| <b>DBP, mmHg</b>             | 79±2.63     | 81±1.97         | 0.32    | 78.5±2.67    | 74.2±3.16       | 0.24    |
| <b>Glucose, mmol/L</b>       | 5.79±0.25   | 4.89±0.21       | 0.03    | 5.84±0.33    | 4.94±0.158      | 0.008   |
| <b>Cholesterol, mmol/L</b>   | 4.72±0.291  | 4.41±0.315      | 0.26    | 4.6±0.269    | 4.22±0.189      | 0.13    |
| <b>HDL-C, mmol/L</b>         | 0.988±0.073 | 1±0.048         | 0.85    | 0.935±0.049  | 0.917±0.046     | 0.92    |
| <b>LDL-C, mg/dL</b>          | 2.95±0.225  | 2.79±0.243      | 0.44    | 2.78±0.217   | 2.61±0.141      | 0.47    |
| <b>Triglycerides, mmol/L</b> | 1.8±0.17    | 1.560±0.128     | 0.03    | 1.99±0.143   | 1.56±0.177      | 0.02    |
| <b>HOMA-IR</b>               | 4.89±0.696  | 3.12±0.226      | 0.03    | 8.67±1.94    | 3.6±0.468       | 0.01    |
| <b>AUC glucose, mmol/L</b>   | 1112±63.3   | 929±20.9        | 0.03    | 1090±78.1    | 912±49.5        | 0.003   |
| <b>AUC insulin pmol/L</b>    | 95819±15010 | 90752±13789     | 0.51    | 108348±10225 | 76501±10301     | 0.004   |

BMI indicates body mass index; SBP indicates systolic blood pressure; DBP indicates diastolic blood pressure; HDL-C indicates high density lipoprotein cholesterol; LDL-C indicates low density lipoprotein cholesterol; AUC indicates area under the curve; DI+P indicates dietary intervention plus placebo; DI+FF indicates dietary intervention plus functional foods. All values are presented as mean $\pm$  SEM. Paired T-test was performed for all variables. Significant at  $p < 0.05$ .

**Figure S1. Flow chart of the randomized control-placebo study.**

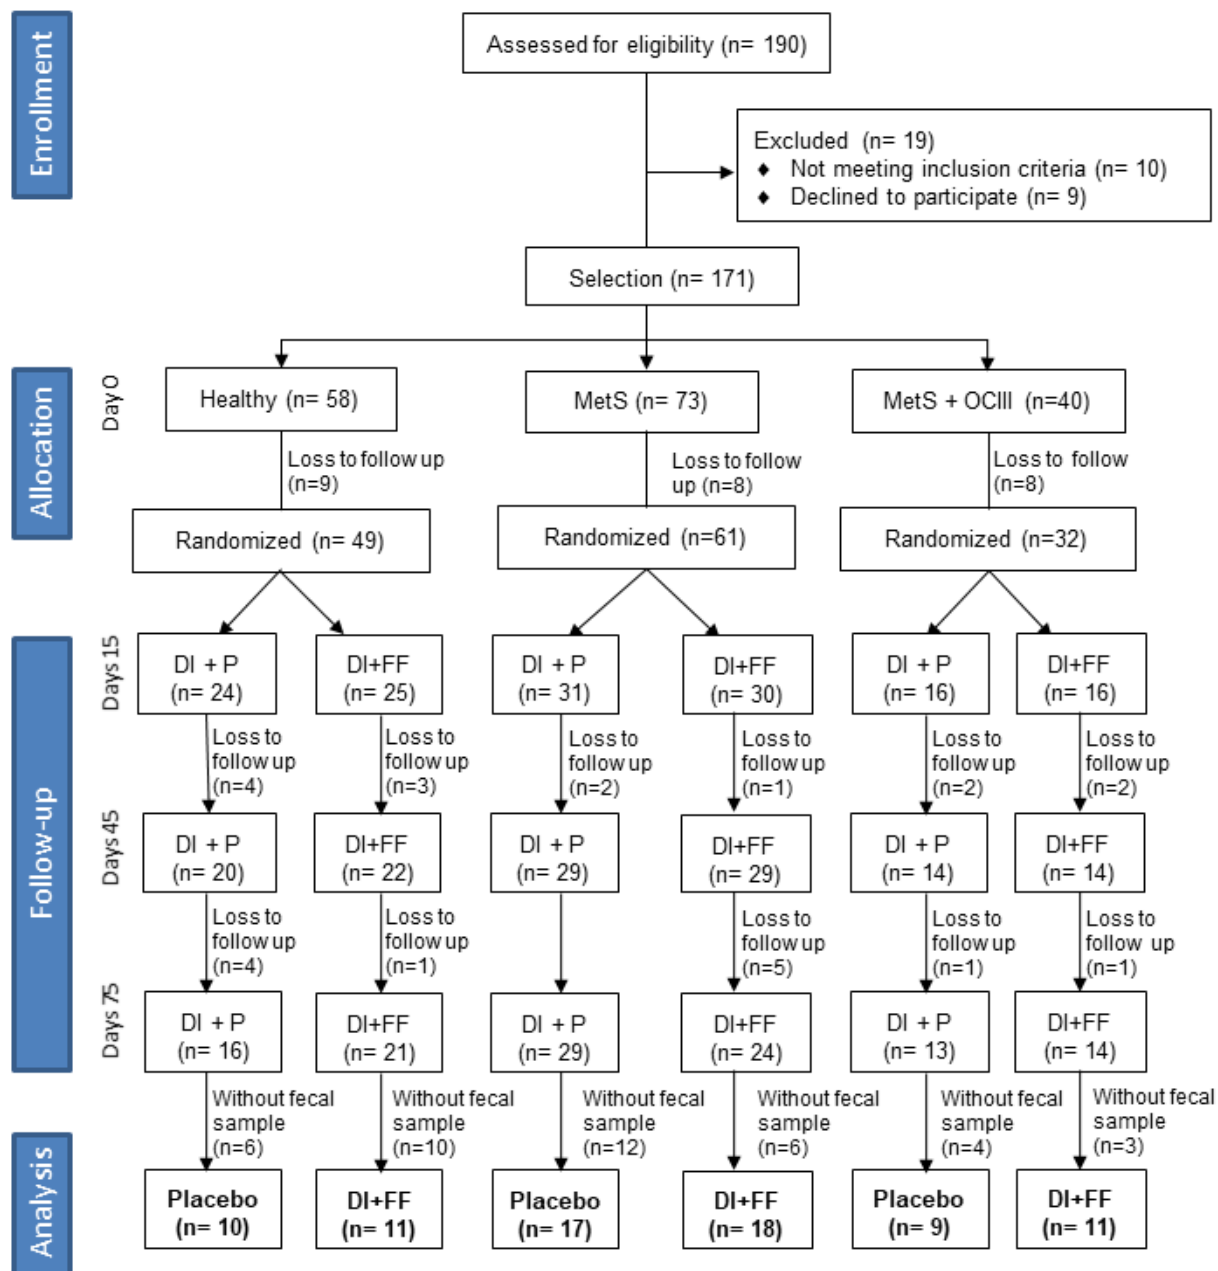

**Figure S2. Physical activity and presence of intestinal bowel syndrome prevalence in the population. A) Physical activity in 1032 participants with and without metabolic syndrome and B) presence of intestinal bowel syndrome in 509 participants.**

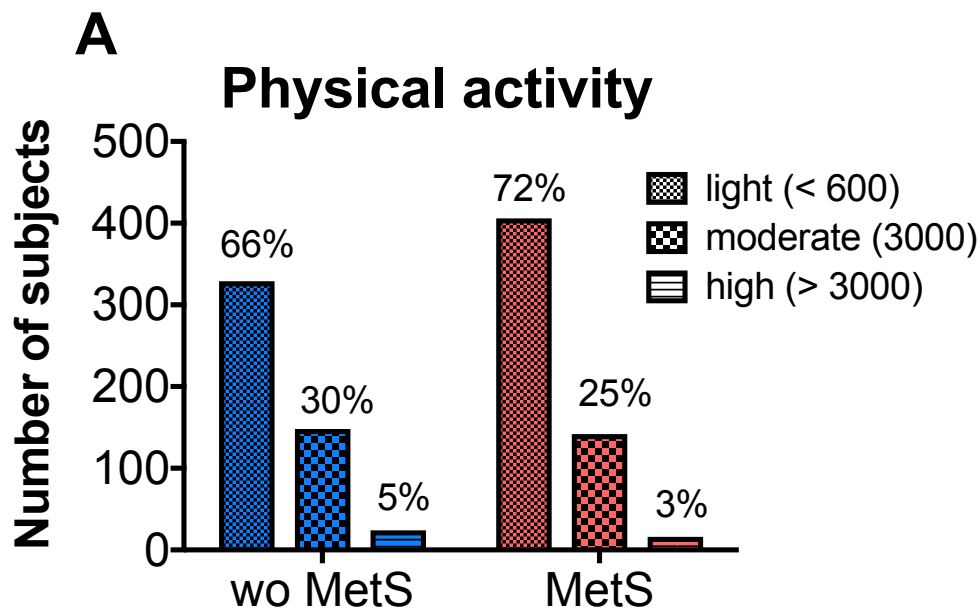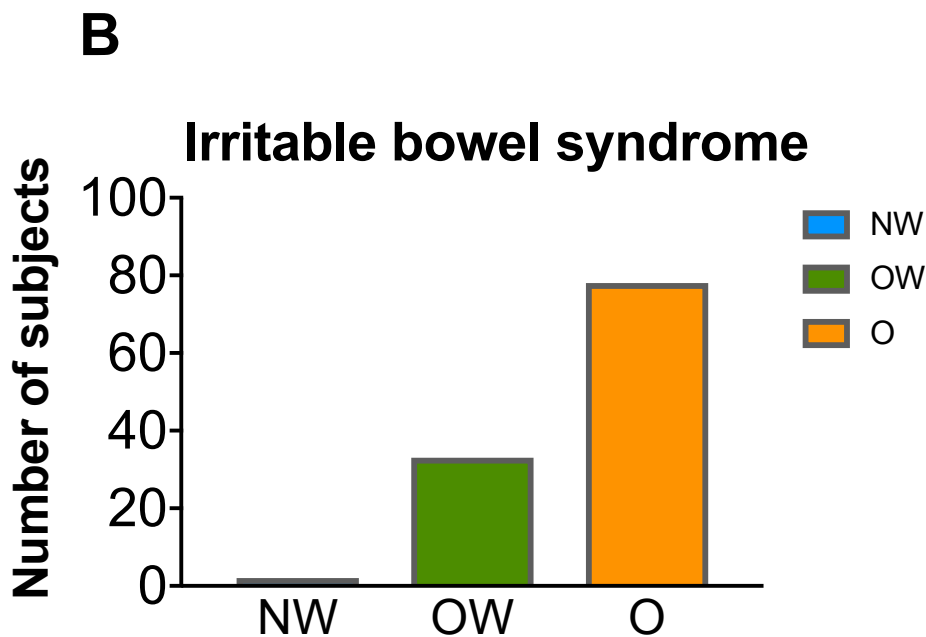

Supplement: JAH3-8-e012401-s001.pdf [file JAH3-8-e012401-s001.pdf]
